# Supplementary material for: Rectangular architectures formed by acyclic diamido-metal-N-heterocyclic carbenes with skewed conformation
Source: Royal Society of Chemistry journal article supplement (doi:10.1039/b702032p), 2007-01-01
Supplement: b702032p.pdf [file b702032p.pdf]

**Supplementary Information**

**Tubular Architectures Formed by Acyclic Diamido-Metal-N-Heterocyclic  
Carbenes with Skewed Conformation**

Kwang-Ming Lee,\* Jack C. C. Chen, Chao-June Huang, Ivan J. B. Lin,\*

**Experimental procedure**

**1:** [L/H]Br: A mixture of 1-(2-pyrazinyl)-imidazole (30 mmol) and acetamide bromide (30 mmol) were refluxed in dry acetonitrile overnight. After cooling, the acetonitrile solution was removed by a rotary evaporator and the crude product was recrystallized from methanol to give a white product with a yield of 75%. The PF<sub>6</sub><sup>-</sup> salt was obtained from the bromide salt by a simple metathesis reaction with an equivalence of NH<sub>4</sub>PF<sub>6</sub>. **1:** Hg(OAc)<sub>2</sub> (0.09 g, 0.285 mmol) was added to a solution of [L/H]PF<sub>6</sub> (0.20 g, 0.57 mmol) in dry acetonitrile (100 mL). After stirring for 16 hrs, the acetonitrile solution was filtered and dried by a rotary evaporator. The solid was washed with methanol and ether with a yield of 77%. Single crystals suitable for X-ray diffraction were obtained by recrystallization from acetonitrile. Calcd. for HgC<sub>20</sub>H<sub>21</sub>N<sub>11</sub>O<sub>2</sub>P<sub>2</sub>F<sub>12</sub>: C, 25.61; H, 2.26; N, 16.43. Found: C, 25.31; H, 2.44; N, 16.89 %.

**2:** Compound **2** was obtained by the method similar to that of **1** with [L2H]PF<sub>6</sub> in place of [L/H]PF<sub>6</sub> (yield : 82%). Calcd. for HgC<sub>18</sub>H<sub>18</sub>N<sub>10</sub>O<sub>2</sub>P<sub>2</sub>F<sub>12</sub>: C, 24.10; H, 2.02; N, 15.62. Found: C, 24.23; H, 1.94; N, 15.50 %.

**3:** Compound **3** was obtained by the method similar to that of **2** with [L2H]BF<sub>4</sub> in place of [L2H]PF<sub>6</sub> (yield : 80%). Calcd. for C<sub>18</sub>H<sub>18</sub>B<sub>2</sub>F<sub>8</sub>HgN<sub>10</sub>O<sub>2</sub>: C, 27.70; H, 2.32; N, 17.94. Found: C, 27.43; H, 2.36; N, 17.85 %.

**4:** Ag<sub>2</sub>O (0.166 g, 7.16 mmole) was added to a solution of [L2H]PF<sub>6</sub> (0.50 g,

Electronic Supplementary Material for CrystEngComm

This journal is © The Royal Society of Chemistry 2007

1.43 mmole) in dry acetonitrile (25 mL). After stirring for 72 hrs, the acetonitrile solution was filtered and dried by a rotary evaporator. The solid was washed with methanol and ether (yield : 85%). Single crystals suitable for X-ray diffraction were obtained by recrystallization from DMSO. Calcd. for  $C_{22}H_{34}AgF_6N_{10}O_4PS_2$ : C, 32.24; H, 4.18; N, 17.09. Found: C, 32.11; H, 4.17; N, 17.01 %.

### Crystal Structures

(a)

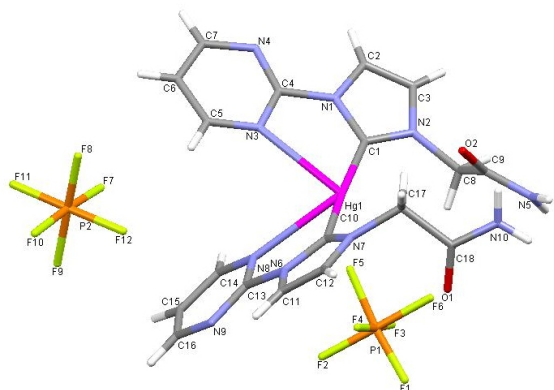

(b)

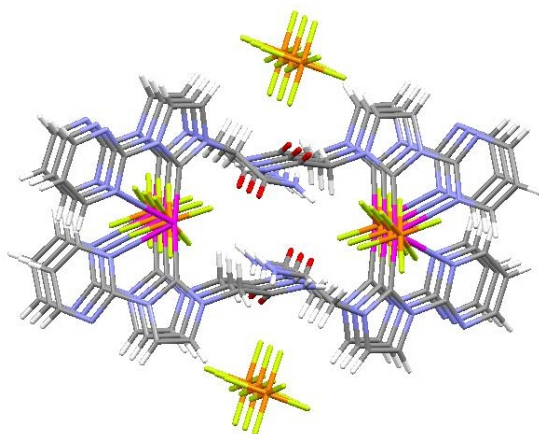

(c)

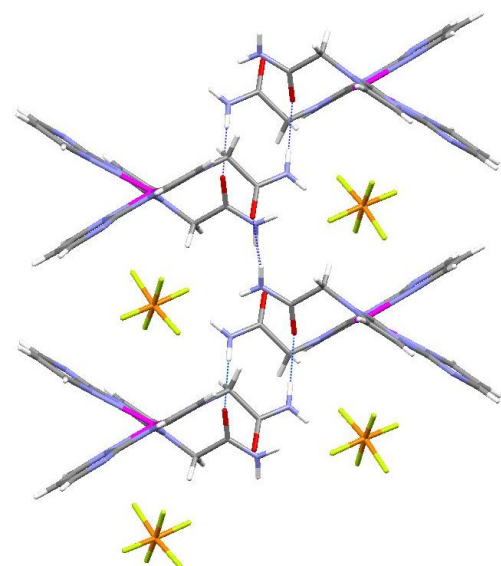

Figure 1. a) Crystal structure of complex **2**; b) Top view and c) Side view of the rectangular tube of **2**. The bond distances and angle of N-H...O hydrogen bond: (N)H...O: 2.05 Å, N...O: 2.900(15) Å, N-H...O: 168°.

(a)

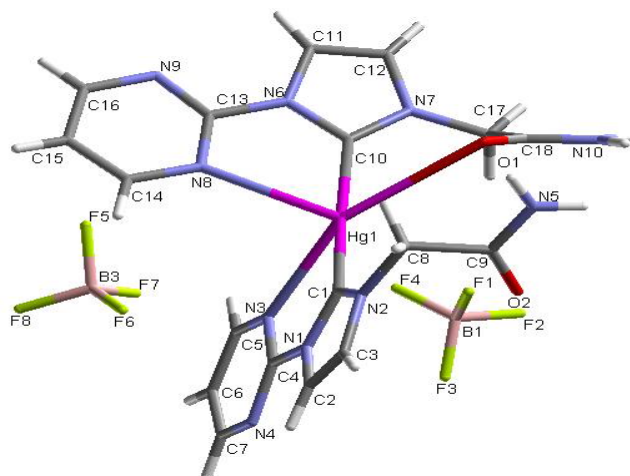

(b)

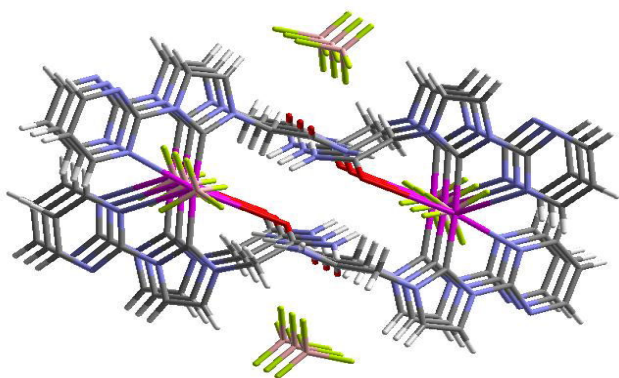

(c)

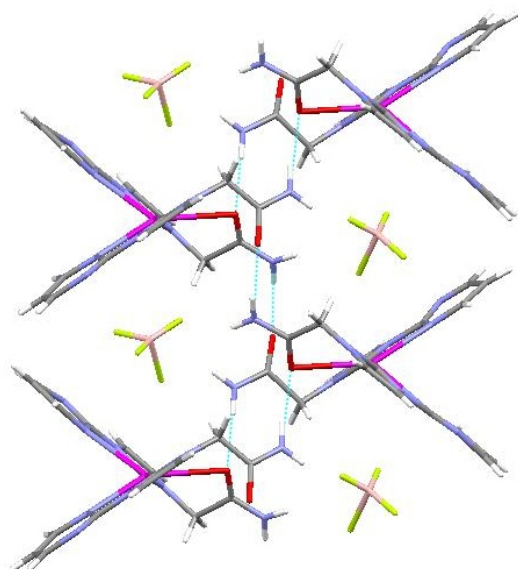

Figure 2. a) Crystal structure of complex **3**; b) Top view and c) Side view of the rectangular tube of **3**. The bond distances and angle of N-H...O hydrogen bond: (N)H...O: 1.99Å, N...O: 2.813(5)Å, N-H...O: 161°.

(a)

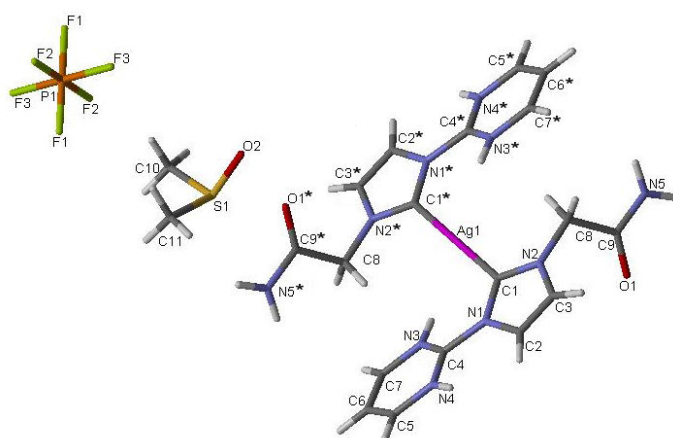

(b)

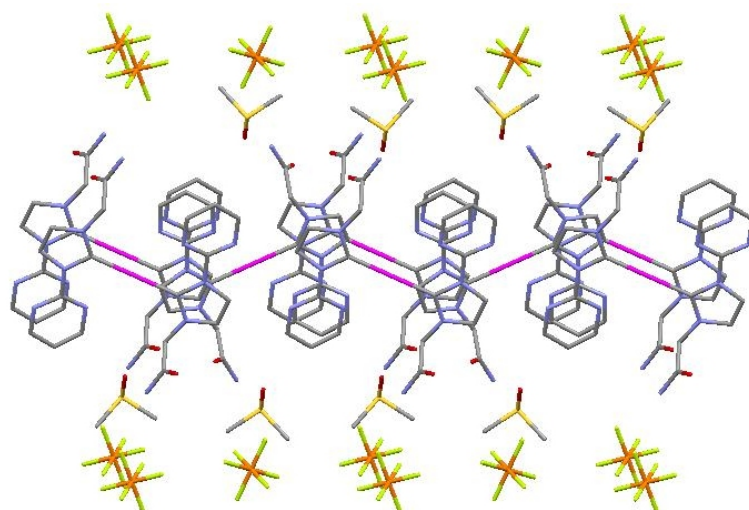

(c)

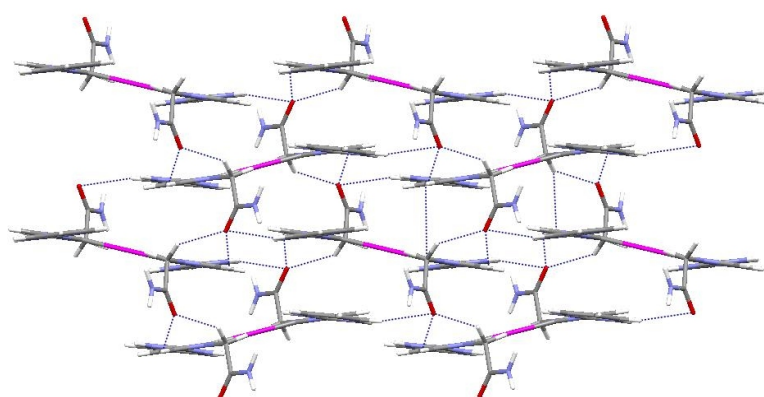

Figure 3. a) Crystal structure of complex 4; b) two-dimensional layered structure and c) C-H...O hydrogen bonding framework. The Ag atoms are located on inversion centers. Atoms flagged with an asterisk (\*) are at equivalent position (1-x,-y,-z)
